# Supplementary material for: Comparison of the Quality of Life of Patients with Breast or Colon Cancer with an Arm Vein Port (TIVAD) Versus a Peripherally Inserted Central Catheter (PICC)
Source: Curr Oncol. 2021 Apr 9;28(2):1495–506. doi: 10.3390/curroncol28020141 (PMC8167661; doi:10.3390/curroncol28020141)
Supplement: Supplementary file 1 [file curroncol-28-00141-s001.pdf]

# Supplement

**Table S1.** Quality of Life Questionnaires related to the venous access device (QLVAD).

| Satisfaction and Quality of Life Survey                                                        | Classification |
|------------------------------------------------------------------------------------------------|----------------|
| 1- Are you right or left handed?                                                               | Procedural     |
| Right or Left                                                                                  |                |
| 2- Arm used for device implantation?                                                           | Procedural     |
| Right or Left                                                                                  |                |
| 3 - Did you choose which arm you wanted the device implanted in?                               | Procedural     |
| Yes                                                                                            |                |
| No                                                                                             |                |
| If No, please explain why, if possible.                                                        |                |
| Text                                                                                           |                |
| 4 - Do you find it easy to present your device for treatment or blood sampling?                | Treatment      |
| Yes                                                                                            |                |
| No                                                                                             |                |
| If No, what issues do you encounter?                                                           |                |
| Text                                                                                           |                |
| 5 - Please tell us how painful it was for you to have your device implanted. (Circle a number) | Procedural     |
| 1 2 3 4 5 6 7 8 9 10                                                                           |                |
| Minimal Moderate Severe                                                                        |                |
| 6 - Do you feel that your device is too visible?                                               | Psychosocial   |
| Yes                                                                                            |                |
| No                                                                                             |                |
| 7 - Do you feel that your device is unsightly or ugly?                                         | Psychosocial   |
| Yes                                                                                            |                |
| No                                                                                             |                |
| 8 - Do you feel that you have changed the way you dress due to your device?                    | Psychosocial   |
| Yes                                                                                            |                |
| No                                                                                             |                |
| 9 - Have people commented on your device when they see it?                                     | Psychosocial   |
| Yes                                                                                            |                |
| No                                                                                             |                |
| 10 - Do you try and cover your device with clothing?                                           | Psychosocial   |
| Yes                                                                                            |                |
| No                                                                                             |                |
| 11 - Does your device make you feel anxious (worried)?                                         | Psychosocial   |
| Yes                                                                                            |                |

|                                                                                      |              |
|--------------------------------------------------------------------------------------|--------------|
| No                                                                                   |              |
| 12 - Does your device make you feel angry?                                           | Psychosocial |
| Yes                                                                                  |              |
| No                                                                                   |              |
| 13- Does your device make you feel self-conscious?                                   | Psychosocial |
| Yes                                                                                  |              |
| No                                                                                   |              |
| 14 - Does your device remind you of your illness?                                    | Psychosocial |
| Yes                                                                                  |              |
| No                                                                                   |              |
| 15 - Does your device make you feel embarrassed?                                     | Psychosocial |
| Yes                                                                                  |              |
| No                                                                                   |              |
| 16 - Are you worried that your device might become damaged?                          | Treatment    |
| Yes                                                                                  |              |
| No                                                                                   |              |
| 17 - Are you worried that your device might become blocked?                          | Treatment    |
| Yes                                                                                  |              |
| No                                                                                   |              |
| 18 - Are you worried that your device might become infected?                         | Treatment    |
| Yes                                                                                  |              |
| No                                                                                   |              |
| 19 - Does your device bother you when performing your work related activities?       | Psychosocial |
| Yes                                                                                  |              |
| No                                                                                   |              |
| If Yes, please explain how.                                                          |              |
| Text                                                                                 |              |
| 20 - Does your device bother you when you shower, bath, or perform personal hygiene? | Psychosocial |
| Yes                                                                                  |              |
| No                                                                                   |              |
| If Yes, please explain how.                                                          |              |
| Text                                                                                 |              |
| 21 - Does your device bother you when you engage in sports or exercise?              | Psychosocial |
| Yes                                                                                  |              |
| No                                                                                   |              |
| If Yes, please explain how.                                                          |              |
| Text                                                                                 |              |
| 22 - Does your device bother you during social activities?                           | Psychosocial |

|                                                                                                                      |              |
|----------------------------------------------------------------------------------------------------------------------|--------------|
|                                                                                                                      |              |
| Yes                                                                                                                  |              |
| No                                                                                                                   |              |
| If Yes, please explain how.                                                                                          |              |
| Text                                                                                                                 |              |
| 23 - Does your device bother you when you are lying down in bed?                                                     | Psychosocial |
| Yes                                                                                                                  |              |
| No                                                                                                                   |              |
| If Yes, please explain how.                                                                                          |              |
| Text                                                                                                                 |              |
| 24 - Does your device hurt?                                                                                          | Treatment    |
| Yes                                                                                                                  |              |
| No                                                                                                                   |              |
| If Yes, please explain how.                                                                                          |              |
| Text                                                                                                                 |              |
| 25 - Rate the degree of discomfort you experience during needle insertion into the device. (Circle a number)         | Treatment    |
| 1 2 3 4 5 6 7 8 9 10                                                                                                 |              |
| Minimal Moderate Severe                                                                                              |              |
| 26 - Rate the degree of discomfort you experience during treatment infusion. (Circle a number)                       | Treatment    |
| 1 2 3 4 5 6 7 8 9 10                                                                                                 |              |
| Minimal Moderate Severe                                                                                              |              |
| 27 - Rate the degree of discomfort you experience during needle removal after treatment. (Circle a number).          | Treatment    |
| 1 2 3 4 5 6 7 8 9 10                                                                                                 |              |
| Minimal Moderate Severe                                                                                              |              |
| 28 - Do you believe that insertion of your device was a good thing to have done? (Circle a number)                   | Psychosocial |
| 1 2 3 4 5 6 7 8 9 10                                                                                                 |              |
| No Probably Definitely                                                                                               |              |
| 29 - Assess your degree of satisfaction with your device. (Circle a number)                                          | Psychosocial |
| 1 2 3 4 5 6 7 8 9 10                                                                                                 |              |
| Not Moderately Very                                                                                                  |              |
| 30 - If you had to have a device implanted for another session of treatment during your life, would you have another | Psychosocial |
| 1 2 3 4 5 6 7 8 9 10                                                                                                 |              |
| No Probably Definitely                                                                                               |              |

**Table S2.** Mixed effects model showing QOL of patients with a port versus a PICC.

| Outcome of Interest* | Covariate      | Estimate | 95% CI          | P values |
|----------------------|----------------|----------|-----------------|----------|
| Procedural scores    | Intercept      | 4.87     | 4.10 – 5.73     | <0.0001  |
|                      | Type of device |          |                 |          |
|                      | Port           | Ref      |                 |          |
|                      | PICC           | -1.98    | -0.92 – (-3.05) | <0.001   |
|                      | Survey         |          |                 |          |
|                      | 1 month        | Ref      |                 |          |

|                     |                |       |              |         |
|---------------------|----------------|-------|--------------|---------|
| Psychosocial scores | 3 month        | 0.11  | -0.47 – 0.69 | 0.713   |
|                     | Intercept      | 3.38  | 2.32 to 4.43 | <0.0001 |
|                     | Type of device |       |              |         |
|                     | Port           | Ref   |              |         |
|                     | PICC           | 2.18  | 0.83 – 3.53  | 0.002   |
|                     | Survey         |       |              |         |
| Treatment scores    | 1 month        | Ref   |              |         |
|                     | 3 month        | -0.13 | -0.58 – 0.84 | 0.71    |
|                     | Intercept      | 2.79  | 2.12 – 3.45  | <0.0001 |
|                     | Type of device |       |              |         |
|                     | Port           | Ref   |              |         |
|                     | PICC           | -0.36 | -1.21 – 0.49 | 0.40    |
|                     | Survey         |       |              |         |
| Treatment scores    | 1 month        | Ref   |              |         |
|                     | 3 month        | -0.28 | -0.77 – 0.22 | 0.27    |
|                     | Intercept      | 2.79  | 2.12 – 3.45  | <0.0001 |
|                     | Type of device |       |              |         |
|                     | Port           | Ref   |              |         |
|                     | PICC           | -0.36 | -1.21 – 0.49 | 0.40    |
|                     | Survey         |       |              |         |
| Treatment scores    | 1 month        | Ref   |              |         |
|                     | 3 month        | -0.28 | -0.77 – 0.22 | 0.27    |
|                     | Intercept      | 2.79  | 2.12 – 3.45  | <0.0001 |
|                     | Type of device |       |              |         |
|                     | Port           | Ref   |              |         |
|                     | PICC           | -0.36 | -1.21 – 0.49 | 0.40    |
|                     | Survey         |       |              |         |
| Treatment scores    | 1 month        | Ref   |              |         |
|                     | 3 month        | -0.28 | -0.77 – 0.22 | 0.27    |
|                     | Intercept      | 2.79  | 2.12 – 3.45  | <0.0001 |

\*Satisfaction score was not significant and is not reported.

**Table S3.** PACS Detected Complications Related to Arm PICCs and Port.

| Complications                               | PICC N=50                           | Port N=51                           | P-values |
|---------------------------------------------|-------------------------------------|-------------------------------------|----------|
|                                             | n (%) [days after device insertion] | n (%) [days after device insertion] |          |
| Infection (Septicemia)                      | 0 (0%)                              | 1(2%) [64]                          | 0.999    |
| Phlebitis                                   | 3 (6%) [8,9,13]                     | 2 (4%) [15,27]                      | 0.67     |
| Device Occlusion                            | 3 (6%) [60,96,205]                  | 1 (2%) [488]                        | 0.36     |
| Arm Swelling                                | 4 (8%) [12, 22, 33, 36]             | 4 (8%) [14,56,10,13]                | 0.999    |
| Arm Pain                                    | 2 (4%) [33, 36]                     | 1 (2%) [10]                         | 0.61     |
| Non-occlusive US detected Venous Thrombosis | 3 (6%) [9, 33, 128]                 | 3*(6%) [56, 15, 10]                 | 0.999    |
| Occlusive US detected Venous Thrombosis     | 4 (8%) [8,12, 13, 36]               | 6**(12%) [10, 13,14, 15, 27, 56]    | 0.74     |
| Explantation – non-routine                  | 0 (0%)                              | 3 (6%) [15, 34, 64]                 | 0.24     |
| Wound dehiscence                            | 0 (0%)                              | 1(2%) [34]                          | 0.999    |
| Total Complications                         | 19 (38%)                            | 21(41%)                             | 0.83     |

\*all were related to Bard port; \*\*4/6 were related to Bard port.
